# Supplementary material for: Label-free colorimetric apta-assay for detection of Escherichia coli based on gold nanoparticles with peroxidase-like amplification
Source: Royal Society of Chemistry journal article supplement (doi:10.1039/d2ay01822e), 2023-01-01
Supplement: d2ay01822e1.pdf [file d2ay01822e1.pdf]

1

## Supporting Information

2

### 3 **Label-free Colorimetric Aptasensor for Detection of *Escherichia coli* Based on Gold**

4

#### **Nanoparticles with Peroxidase-like Amplification**

5 Mengyue Liu<sup>a, b, c</sup>, Fengjuan Zhang<sup>a, b, c</sup>, Shouyi Dou<sup>a, b, c</sup>, Jiashuai Sun<sup>a, b, c</sup>, Frank Vriesekoop<sup>d</sup>, Falan

6

Li<sup>a, b, c</sup>, Yemin Guo<sup>a, b, c \*</sup>, Xia Sun<sup>a, b, c, \*\*</sup>

7

8

9

10 <sup>a</sup> College of Agricultural Engineering and Food Science, Shandong University of Technology, No.

11 266 Xincun Xilu, Zibo, Shandong 255049, China.

12 <sup>b</sup> Shandong Provincial Engineering Research Center of Vegetable Safety and Quality Traceability,

13 No. 266 Xincun Xilu, Zibo, Shandong 255049, China.

14 <sup>c</sup> Zibo City Key Laboratory of Agricultural Product Safety Traceability, No. 266 Xincun Xilu, Zibo,

15 Shandong 255049, China.

16 <sup>d</sup> Department of Food, Land and Agribusiness Management, Harper Adams University, Newport,

17 United Kingdom.

18

19

20 Corresponding author:

21 Professor Xia Sun; Tel: +86-533-2786558; E-mail address: sunxia2151@sina.com.

22 Professor Yemin Guo; Tel: +86-533-2786558; E-mail address: gym@sdut.edu.cn.

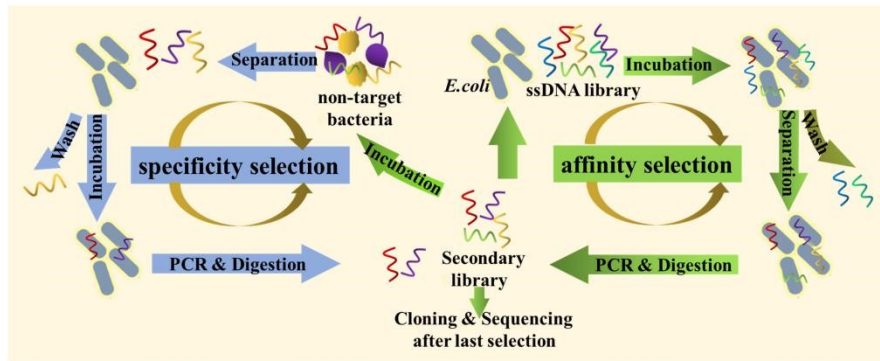

23  
24  
25

Scheme S1. Schematic diagram of Cell-SELEX

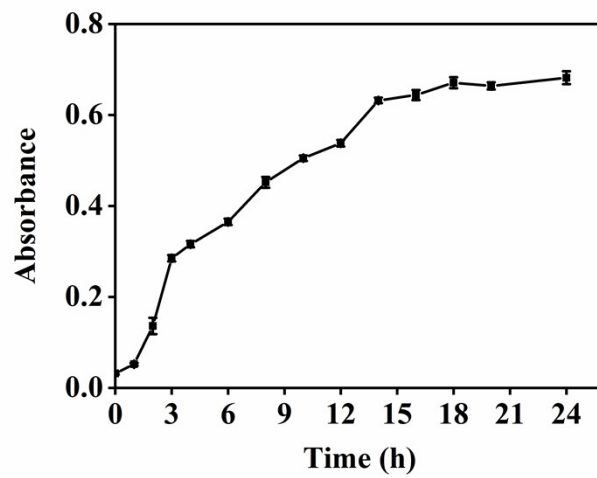

26  
27  
28

Figure S1. Growth curve of *E.coli*

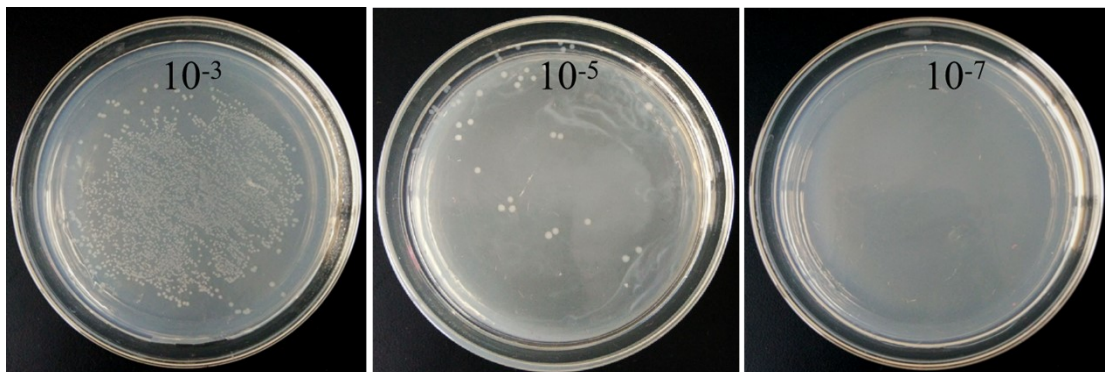

29  
30  
31

Figure S2. Colony diagram of *E.coli*

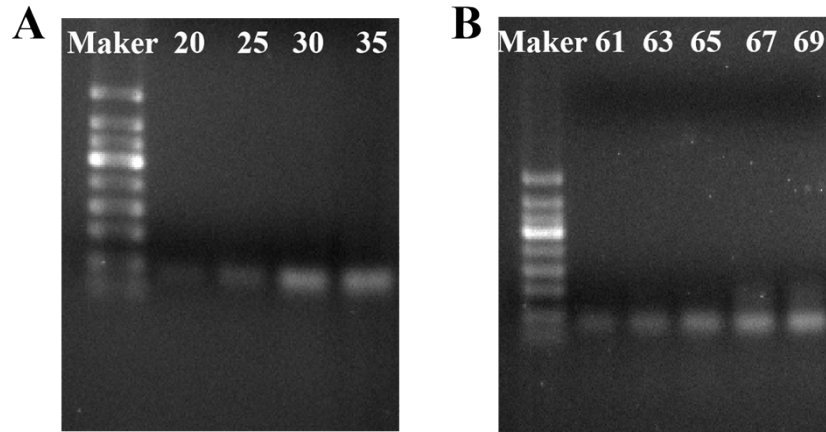

32  
33 Figure S3. Optimization of PCR conditions (A) Number of cycles; (B) Annealing temperature;  
34

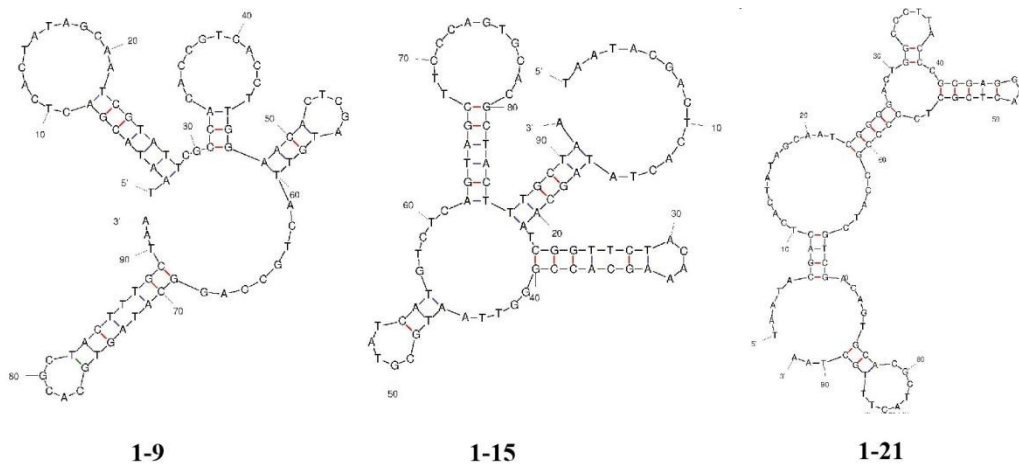

35  
36 Figure S4. Secondary structures of sequences  
37

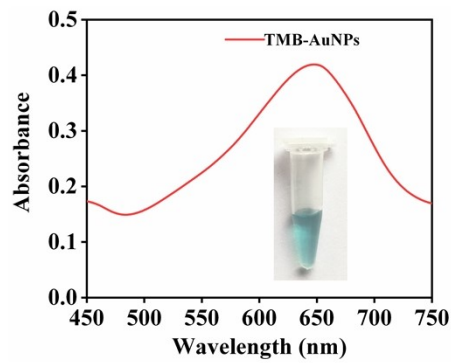

38  
39 Figure S5. Spectrum and color image of TMB-AuNPs

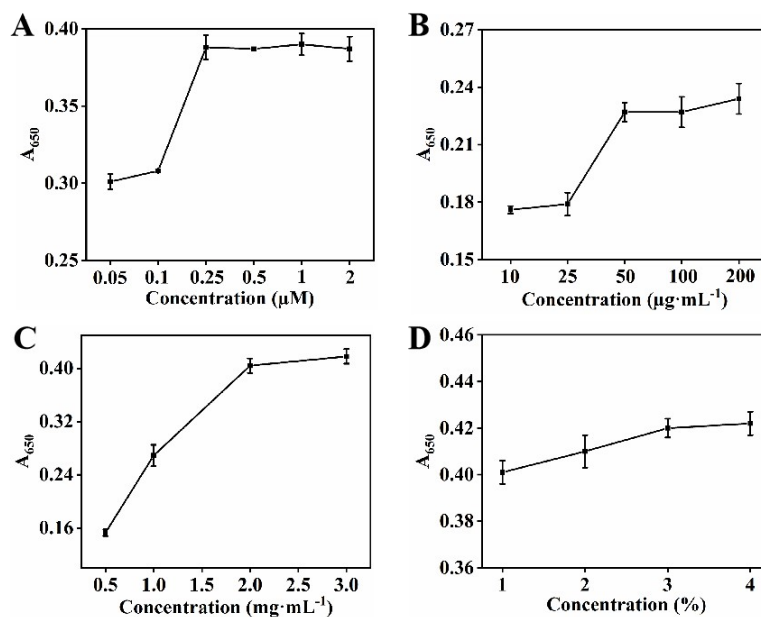

40  
41  
42  
43

Figure S6. Optimization of the detection conditions (A) Aptamer concentration; (B) CTAB concentration; (C) TMB concentration; (D)  $\text{H}_2\text{O}_2$  concentration;

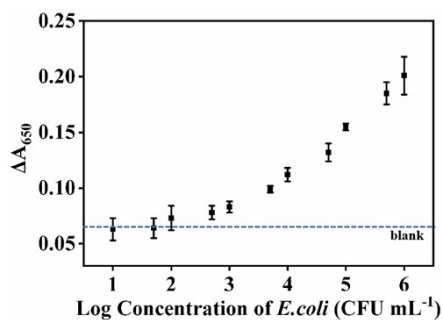

44  
45  
46  
47  
48  
49  
50  
51  
52  
53  
54  
55  
56  
57  
58  
59  
60  
61  
62

Figure S7. Changes of  $\Delta A_{650}$  at the concentration of *E. coli* from  $1 \times 10^1$  to  $1 \times 10^6$

63

**Table S1** The conditions for aptamers selection

| Selection round | ssDNA (nmol) | Concentration of E.coli (CFU/mL) | counter target (CFU/mL) | Incubation time of ssDNA library and targets (min) |
|-----------------|--------------|----------------------------------|-------------------------|----------------------------------------------------|
| 1               | 250          | 10 <sup>5</sup>                  | -                       | 120                                                |
| 2               | 150          | 10 <sup>5</sup>                  | -                       | 90                                                 |
| 3               | 150          | 10 <sup>5</sup>                  | -                       | 90                                                 |
| 4               | 150          | 10 <sup>5</sup>                  | -                       | 90                                                 |
| 5               | 100          | 10 <sup>5</sup>                  | -                       | 60                                                 |
| 6               | 100          | 10 <sup>5</sup>                  | -                       | 60                                                 |
| 7               | 100          | 10 <sup>5</sup>                  | -                       | 60                                                 |
| 8               | 50           | 10 <sup>5</sup>                  | 10 <sup>5</sup>         | 40                                                 |
| 9               | 50           | 10 <sup>5</sup>                  | -                       | 40                                                 |
| 10              | 50           | 10 <sup>5</sup>                  | -                       | 40                                                 |
| 11              | 50           | 10 <sup>5</sup>                  | -                       | 40                                                 |

64

65

**Table S2** The sequences from 5'-3'

| Name | Sequences 5'-3'                                                                                  |
|------|--------------------------------------------------------------------------------------------------|
| 1-9  | TAATACGACTCACTATAGCAATCGTATTCGCCACACCGTCACCTTGGAACACTCGA<br>TGTTACTGCCAGGCATAGTGCACGCTACTTTGCTAA |
| 1-15 | TAATACGACTCACTATAGCAATCGGTTCTACAAAGCACCGGGTTAATGCGTATCAT<br>GTCTCAGTAGCTTCCCAGTGCACGCTACTTTGCTAA |
| 1-21 | TAATACGACTCACTATAGCAATCGGGGACTGGCCCTTACCCGCGAGGAACTCGCT<br>CCCCCGCCATCGTCGACAGTGCACGCTACTTTGCTAA |

66

67

68

69

70

71

72

**Table S3** Comparison of colorimetric methods for *Escherichia coli* detection

| Analyte                            | Strategy                                                                                                                     | Linear range                                     | LOD                                        | Matrix                      | Ref       |
|------------------------------------|------------------------------------------------------------------------------------------------------------------------------|--------------------------------------------------|--------------------------------------------|-----------------------------|-----------|
| <i>Escherichia coli</i>            | based on bacterial inhibition of glucose oxidase-catalyzed reaction                                                          | $10^4$ - $10^8$<br>CFU mL <sup>-1</sup>          | $7.48 \times 10^3$<br>CFU mL <sup>-1</sup> | /                           | [1]       |
| <i>Escherichia coli</i>            | aptamers immobilized on nitrocellulose membranes housed within a microfluidic system and HRP-TMB color reaction              | /                                                | $10^4$<br>CFU mL <sup>-1</sup>             | joint fluids                | [2]       |
| <i>Escherichia coli</i><br>O157:H7 | dependent on the electrostatic interaction between bacteria and negatively charged AuNPs by adjusting the pH                 | /                                                | $4.4 \times 10^7$<br>CFU mL <sup>-1</sup>  | /                           | [3]       |
| <i>Escherichia coli</i>            | based on 4-mercaptophenylboronic acid functionalized AuNPs                                                                   | $10^4$ - $10^7$<br>CFU mL <sup>-1</sup>          | $1.02 \times 10^3$<br>CFU mL <sup>-1</sup> | tap water;<br>bottled water | [4]       |
| <i>Escherichia coli</i>            | using the peroxidase-like activity of chitosan-coated iron oxide magnetic nanoparticles                                      | $10^2$ - $10^6$<br>CFU mL <sup>-1</sup>          | $10^2$<br>CFU mL <sup>-1</sup>             | /                           | [5]       |
| <i>Escherichia coli</i><br>O157:H7 | based on label-free aptamers and AuNPs                                                                                       | /                                                | $10^5$<br>CFU mL <sup>-1</sup>             | /                           | [6]       |
| <i>Escherichia coli</i>            | through the capture of AuNPs by chimeric phages                                                                              | /                                                | $10^2$<br>CFU mL <sup>-1</sup>             | /                           | [7]       |
| <i>Escherichia coli</i>            | using a supramolecular enzyme-nanoparticle                                                                                   | /                                                | $10^4$<br>CFU mL <sup>-1</sup>             | /                           | [8]       |
| <i>Escherichia coli</i>            | based on the enzyme-induced metallization of gold nanorods                                                                   | /                                                | $10^5$<br>CFU mL <sup>-1</sup>             | /                           | [9]       |
| <i>Escherichia coli</i>            | using AuNPs with peroxidase-like activity to catalyze the oxidation of TMB by hydrogen peroxide to produce color development | $5 \times 10^2$ - $10^6$<br>CFU mL <sup>-1</sup> | 75<br>CFU mL <sup>-1</sup>                 | water;<br>juice; milk       | this work |

74

75

76

77

78

79

80

81

82

83

## 84 Reference

- 85 1 J. Sun, J. Huang, Y. Li, J. Lv and X. Ding, *Talanta*, 2019, **197**, 304-309.
- 86 2 C. Wang, J. Wu and G. B. Lee, *Sensor. Actuat. B-Chem.*, 2019, **284**, 395-402.
- 87 3 J. Du, Z. Yu, Z. Hu, J. Chen, J. Zhao and Y. Bai, *J. Microbiol. Meth.*, 2021, **180**, 1-6.
- 88 4 J. Huang, J. Sun, A. R. Warden and X. Ding, *Food Control*, 2020, **108**, 1-7.
- 89 5 T. N. Le, T. D. Tran and M. I. Kim, *Nanomaterials*, 2020, **10**, 1-11.
- 90 6 W. Wu, M. Li, Y. Wang, H. Ouyang, L. Wang, C. Li, Y. Cao, Q. Meng and J. Lu, *Nanoscale Res. Lett.*, 2012, **7**, 658.
- 92 7 H. Peng and I. A. Chen, *ACS Nano*, 2019, **13**, 1244-1252.
- 93 8 O. R. Miranda, X. Li, L. G. Gonzalez, Z. Zhu, B. Yan, U. H. F. Bunz and V. M. Rotello, *J. Am. Chem. Soc.*, 2011, **133**, 9650-9653.
- 95 9 J. Chen, A. A. Jackson, V. M. Rotello and S. R. Nugen, *Small*, 2016, **12**, 2469-2475.
